# Supplementary material
Source: publisher site journal article supplement (https://oneecosystem.pensoft.net/article/download/suppl/4512831/)
Supplement: Supplementary file 1

| No. | Location | Date | Topic |
| --- | --- | --- | --- |
| 1 | Kiel, Germany | 04.05.-07.05.2015 | Project Kick-off meeting |
| 2 | Riga, Latvia | 13.10.-16.10.2015 | Stakeholder Workshop on ES mapping and assessment in EU member states at national level - Identified gaps and possible solutions |
| 3 | Nottingham, UK | 13.04.-16.04.2016 | Flexible methods for ES mapping and assessment |
| 4 | Prague, Czech Republic | 26.09.-29.09.2016 | Testing methods across Europe |
| 5 | Amsterdam, The Netherlands | 09.01.-12.01.2017 | Testing methods across themes |
| 6 | Madrid, Spain | 04.04.-07.04.2017 | Testing methods across biomes and regions |
| 7 | Plovdiv, Bulgaria | 02.10.-05.10.2017 | Flexible methods for ES mapping and assessment |
| 8 | Trento, Italy | 22.01.-25.01.2017 | Testing final methods in policy and decision making |
| 9 | Eger, Hungary | 19.03.-22.03.2018 | Testing final methods in policy and decision making (II) |
| 10 | Brussels, Belgium | 11.06.-13.06.2018 | Final Project Conference |
| add-on | Ponta Delgada (Azores), Portugal | 28.02.-03.03.2017 | MAES in EU’s Outermost Regions and Overseas Countries & Territories |
